# Supplementary material for: Rapid P-TEFb-dependent transcriptional reorganization underpins the glioma adaptive response to radiotherapy
Source: PubMed Central journal article supplement (PMC11139976; doi:10.1038/s41467-024-48214-3), 2024-05-30
Supplement: 41467_2024_48214_MOESM2_ESM.pdf [file 41467_2024_48214_MOESM2_ESM.pdf]

## DESCRIPTION OF ADDITIONAL SUPPLEMENTARY FILES

**Supplementary Data 1.** Functional enrichment analysis of ATAC-seq. Enrichment defined by Metascape using hypergeometric test and Benjamini-Hochberg P value correction algorithm.

**Supplementary Data 2.** Functional enrichment analysis of H3K27ac. Enrichment defined by Metascape using hypergeometric test and Benjamini-Hochberg P value correction algorithm.

**Supplementary Data 3.** Functional enrichment analysis of RNA-seq. Enrichment defined by Metascape using hypergeometric test and Benjamini-Hochberg P value correction algorithm.

**Supplementary Data 4.** Functional enrichment analysis of CDK9-dependent gene expression. Enrichment defined by Metascape using hypergeometric test and Benjamini-Hochberg P value correction algorithm.

**Supplementary Data 5.** STR profiling of cell culture models.
